# Supplementary material
Source: publisher figshare collection journal article supplement (https://sage.figshare.com/ndownloader/files/17477336)
Supplement: Supplementary file 1 [file 17477336]

**Table A1. Imbalance between Treatment and Control Groups\***

|                                 | Without matching |         |         |         |         |                                     | With matching   |       |      |       |        |                                     |
|---------------------------------|------------------|---------|---------|---------|---------|-------------------------------------|-----------------|-------|------|-------|--------|-------------------------------------|
|                                 | $\mathcal{L}_1$  | Mean    | p25     | p50     | p75     | <i>p</i> -value<br>(equal<br>means) | $\mathcal{L}_1$ | Mean  | p25  | p50   | p75    | <i>p</i> -value<br>(equal<br>means) |
| <i>Multivariate imbalance:</i>  |                  |         |         |         |         |                                     |                 |       |      |       |        |                                     |
| Global $\mathcal{L}_1$ distance | .96              |         |         |         |         |                                     | .83             |       |      |       |        |                                     |
| <i>Univariate imbalance:</i>    |                  |         |         |         |         |                                     |                 |       |      |       |        |                                     |
| Population                      | .17              | -.06    | .15     | -.07    | -.24    | < .10                               | .07             | -.02  | -.06 | -.02  | .00    | > .10                               |
| Income per capita               | .24              | -121.30 | -100.32 | -131.35 | -129.31 | < .01                               | .09             | -6.72 | -.40 | -7.55 | -18.34 | > .10                               |
| Urban                           | .19              | -.07    | -.06    | -.12    | -.10    | < .01                               | .04             | .00   | -.01 | .00   | .00    | > .10                               |
| Service coverage                | .19              | -.05    | .00     | -.09    | -.11    | < .01                               | .04             | .00   | .01  | .01   | .00    | > .10                               |

\* This table provides imbalance statistics between SOEs and other organization forms without and with coarsened exact matching.

**Table A2. The Effect of State Elections on State-owned Enterprises\***

| Hypothesis tested                              | H1              | H2a            | -               | H3             | -               | H4             |
|------------------------------------------------|-----------------|----------------|-----------------|----------------|-----------------|----------------|
| Dependent variable                             | Return on sales | Log employment | Return on sales | Log employment | Return on sales | Log employment |
|                                                | (1)             | (2)            | (3)             | (4)            | (5)             | (6)            |
| <i>Main independent variables</i>              |                 |                |                 |                |                 |                |
| State election × SOE                           | −.037*          | .062**         | −.446**         | .369*          | −.072**         | .077**         |
|                                                | (.018)          | (.010)         | (.164)          | (.156)         | (.021)          | (.013)         |
| State election × SOE ×<br>Community poverty    |                 |                | −.070*          | .052*          |                 |                |
|                                                |                 |                | (.028)          | (.025)         |                 |                |
| State election × SOE with<br>private investors |                 |                |                 |                | .074**          | −.041**        |
|                                                |                 |                |                 |                | (.013)          | (.010)         |
| <i>Controls</i>                                |                 |                |                 |                |                 |                |
| State election                                 | −.008           | −.012          | −.227           | −.118          | −.008           | −.012          |
|                                                | (.017)          | (.009)         | (.138)          | (.142)         | (.017)          | (.009)         |
| Municipal election                             | −.030+          | −.007          | −.084           | .150           | −.031+          | −.004          |
|                                                | (.018)          | (.011)         | (.194)          | (.168)         | (.018)          | (.011)         |
| SOE                                            | .274            | .163           | 8.618*          | −1.604         | .283            | .082           |
|                                                | (.245)          | (.265)         | (3.989)         | (2.048)        | (.253)          | (.249)         |
| Municipal election × SOE                       | .040*           | .017           | −.064           | .149           | .029            | .043**         |
|                                                | (.018)          | (.012)         | (.212)          | (.181)         | (.021)          | (.014)         |
| Municipal population                           | −.029           | .115           | −.054           | .097           | −.031           | .116           |
|                                                | (.102)          | (.074)         | (.106)          | (.070)         | (.102)          | (.073)         |
| Municipal GDP                                  | .059**          | .171**         | .055**          | .172**         | .057**          | .170**         |
|                                                | (.019)          | (.015)         | (.019)          | (.015)         | (.019)          | (.015)         |
| Urban                                          | .127            | .573**         | .111            | .585**         | .126            | .536**         |
|                                                | (.167)          | (.140)         | (.169)          | (.141)         | (.168)          | (.139)         |
| State unemployment rate                        | −.001           | −.006          | −.002           | −.006          | −.003           | −.004          |
|                                                | (.005)          | (.004)         | (.005)          | (.004)         | (.005)          | (.004)         |
| Federal transfers to the<br>municipality       | −.007**         | .005           | −.006*          | .005           | −.006**         | .005           |
|                                                | (.002)          | (.004)         | (.002)          | (.004)         | (.002)          | (.004)         |
| Federal funds to water and<br>sanitation       | −.000           | .001           | −.000           | .001           | −.000           | .001           |
|                                                | (.001)          | (.001)         | (.001)          | (.001)         | (.001)          | (.001)         |
| State funds to water and<br>sanitation         | .002            | −.000          | .002            | −.000          | .002            | −.000          |
|                                                | (.002)          | (.001)         | (.002)          | (.001)         | (.002)          | (.001)         |
| Homicides                                      | −.007           | .006           | −.007           | .007           | −.007           | .005           |
|                                                | (.007)          | (.006)         | (.007)          | (.006)         | (.007)          | (.006)         |
| Sewerage                                       | −.011           | .204**         | .000            | .190**         | −.010           | .196**         |
|                                                | (.036)          | (.039)         | (.034)          | (.037)         | (.036)          | (.039)         |
| Municipal alignment                            | −.013           | −.006          | −.013           | −.005          | −.012           | −.006          |
|                                                | (.013)          | (.010)         | (.013)          | (.010)         | (.013)          | (.010)         |
| State alignment                                | −.010           | .001           | −.013           | .002           | −.010           | .002           |
|                                                | (.026)          | (.021)         | (.026)          | (.021)         | (.026)          | (.021)         |

|                    |                   |                  |                   |                  |                   |                  |
|--------------------|-------------------|------------------|-------------------|------------------|-------------------|------------------|
| Left-wing mayor    | .017<br>(.015)    | .006<br>(.016)   | .016<br>(.015)    | .008<br>(.016)   | .017<br>(.015)    | .005<br>(.015)   |
| Left-wing governor | -.122**<br>(.025) | .079**<br>(.016) | -.123**<br>(.026) | .081**<br>(.016) | -.127**<br>(.025) | .082**<br>(.016) |
| Corrupt mayor      | -.037<br>(.023)   | -.014<br>(.019)  | -.039+<br>(.023)  | -.017<br>(.019)  | -.038<br>(.023)   | -.016<br>(.019)  |
| Corrupt governor   | .062<br>(.058)    | -.357*<br>(.144) | .060<br>(.060)    | -.358*<br>(.143) | .070<br>(.059)    | -.359*<br>(.145) |
| Utility FE         | Yes               | Yes              | Yes               | Yes              | Yes               | Yes              |
| Observations       | 15055             | 15055            | 14898             | 14898            | 15055             | 15055            |
| R-squared          | .624              | .946             | .627              | .947             | .625              | .946             |

+  $p < .10$ , \*  $p < .05$ ; \*\*  $p < .01$ ; two-tailed tests.

\* Standard errors clustered at the utility level are shown in parentheses. In model 4, the two-way interaction between election year dummies and poor community, the two-way interaction between SOE and poor community, and the three-way interaction between municipal election, SOE, and poor community are also included. In model 5, the two-way interaction between municipal election and SOE with private investors is included. The indicator for SOE with private investors is also included directly. These coefficients are not reported here to conserve space.

**Table A3. Employment as a Mediator between State Elections and Financial Performance of State-owned Enterprises\***

| Hypothesis tested                     | H2a               | H2b                |
|---------------------------------------|-------------------|--------------------|
|                                       | Log<br>employment | Return on<br>sales |
| Dependent variable                    | 1st stage         | 2nd stage          |
|                                       | (1)               | (2)                |
| <i>Instrumental variable</i>          |                   |                    |
| Bartik-like instrument                | .131**<br>(.031)  |                    |
| <i>Mediating variable</i>             |                   |                    |
| Log employment at organization        |                   | -.650*<br>(.293)   |
| <i>Main independent variables</i>     |                   |                    |
| State election × SOE                  | .054**<br>(.006)  | -.040*<br>(.018)   |
| <i>Controls</i>                       |                   |                    |
| State election                        | -.005<br>(.005)   | .012<br>(.008)     |
| Municipal election                    | .004<br>(.006)    | -.009<br>(.010)    |
| SOE                                   | -.292*<br>(.144)  | -.184<br>(.151)    |
| Municipal election × SOE              | .013+<br>(.007)   | .030**<br>(.011)   |
| Municipal population                  | .155**<br>(.040)  | .122<br>(.084)     |
| Municipal GDP                         | .147**<br>(.013)  | .178**<br>(.058)   |
| Urban                                 | .226*<br>(.094)   | .379**<br>(.123)   |
| State unemployment rate               | -.005+<br>(.003)  | -.005<br>(.004)    |
| Federal transfers to the municipality | .003<br>(.003)    | -.001<br>(.003)    |
| Federal funds to water and sanitation | .001<br>(.001)    | .001<br>(.001)     |
| State funds to water and sanitation   | -.001<br>(.001)   | .000<br>(.001)     |
| Homicides                             | .015**<br>(.004)  | .006<br>(.007)     |
| Sewerage                              | .205**<br>(.024)  | .127*<br>(.063)    |
| Municipal alignment                   | -.004             | -.013              |

|                               |         |        |
|-------------------------------|---------|--------|
|                               | (.007)  | (.009) |
| State alignment               | -.004   | -.013  |
|                               | (.014)  | (.017) |
| Left-wing mayor               | .011    | .015   |
|                               | (.011)  | (.013) |
| Left-wing governor            | .069**  | -.041+ |
|                               | (.009)  | (.023) |
| Corrupt mayor                 | -.014   | -.027  |
|                               | (.012)  | (.019) |
| Corrupt governor              | -.495** | -.168  |
|                               | (.132)  | (.157) |
| Utility FE                    | Yes     | Yes    |
| Observations                  | 41068   | 41068  |
| R-squared                     | .940    | .574   |
| Cragg–Donald Wald F statistic | 49.11   |        |

+  $p < .10$ , \*  $p < .05$ ; \*\*  $p < .01$ ; two-tailed tests.

\* Standard errors clustered at the utility level are shown in parentheses.

**Table A4. The Effect of State Elections on Investment of State-owned Enterprises\***

| <b>Dependent variable</b>             | <b>Log investment<br/>(1)</b> |
|---------------------------------------|-------------------------------|
| <i>Main independent variables</i>     |                               |
| State election × SOE                  | .432**<br>(.149)              |
| <i>Controls</i>                       |                               |
| State election                        | -.170<br>(.139)               |
| Municipal election                    | .059<br>(.154)                |
| SOE                                   | -.300<br>(1.364)              |
| Municipal election × SOE              | -.303+<br>(.166)              |
| Municipal population                  | .540<br>(.731)                |
| Municipal GDP                         | .810**<br>(.164)              |
| Urban                                 | 1.093<br>(1.565)              |
| State unemployment rate               | -.081*<br>(.040)              |
| Federal transfers to the municipality | .136**<br>(.043)              |
| Federal funds to water and sanitation | -.007<br>(.012)               |
| State funds to water and sanitation   | .033*<br>(.013)               |
| Homicides                             | .154*<br>(.067)               |
| Sewerage                              | -.139<br>(.307)               |
| Municipal alignment                   | -.089<br>(.122)               |
| State alignment                       | .256<br>(.259)                |
| Left-wing mayor                       | .114<br>(.171)                |
| Left-wing governor                    | .736**<br>(.219)              |
| Corrupt mayor                         | -.134<br>(.238)               |
| Corrupt governor                      | -.789<br>(1.009)              |
| Utility FE                            | Yes                           |
| Observations                          | 14501                         |
| R-squared                             | .621                          |

+  $p < .10$ ; \*  $p < .05$ ; \*\*  $p < .01$ ; two-tailed tests.

\* Standard errors clustered at the utility level are shown in parentheses.

**Table A5. The Effect of State Elections on State-owned Enterprises: Models with Year Fixed Effects\***

| Hypothesis tested                           | H1                | H2a              | H2b               | H3                | H4                |
|---------------------------------------------|-------------------|------------------|-------------------|-------------------|-------------------|
| Dependent variable                          | Return on sales   | Log employment   | Return on sales   | Log employment    | Log employment    |
|                                             | (1)               | (2)              | (3)               | (4)               | (5)               |
| <i>Main independent variables</i>           |                   |                  |                   |                   |                   |
| State election × SOE                        | −.039*<br>(.018)  | .061**<br>(.011) | −.029<br>(.018)   | .401*<br>(.160)   | .082**<br>(.013)  |
| Log employment at organization              |                   |                  | −.168**<br>(.019) |                   |                   |
| State election × SOE × Community poverty    |                   |                  |                   | .058*<br>(.026)   |                   |
| State election × SOE with private investors |                   |                  |                   |                   | −.046**<br>(.010) |
| <i>Controls</i>                             |                   |                  |                   |                   |                   |
| SOE                                         | .272<br>(.244)    | .155<br>(.267)   | .297<br>(.238)    | −1.911<br>(2.072) | .101<br>(.253)    |
| Municipal election × SOE                    | .040*<br>(.018)   | .012<br>(.013)   | .042*<br>(.018)   | .164<br>(.188)    | .040**<br>(.015)  |
| Municipal population                        | −.006<br>(.104)   | .115<br>(.076)   | .013<br>(.105)    | .095<br>(.071)    | .117<br>(.076)    |
| Municipal GDP                               | .053+<br>(.030)   | .008<br>(.023)   | .055+<br>(.030)   | .008<br>(.023)    | .009<br>(.023)    |
| Urban                                       | .124<br>(.179)    | .188<br>(.153)   | .156<br>(.176)    | .193<br>(.153)    | .184<br>(.152)    |
| State unemployment rate                     | −.000<br>(.006)   | .009+<br>(.005)  | .001<br>(.006)    | .010*<br>(.005)   | .010+<br>(.005)   |
| Federal transfers to the municipality       | −.007**<br>(.002) | −.000<br>(.003)  | −.007**<br>(.002) | −.001<br>(.003)   | −.001<br>(.003)   |
| Federal funds to water and sanitation       | −.000<br>(.001)   | .000<br>(.001)   | −.000<br>(.001)   | .000<br>(.001)    | .000<br>(.001)    |
| State funds to water and sanitation         | .002<br>(.002)    | −.000<br>(.001)  | .002<br>(.002)    | −.000<br>(.001)   | −.000<br>(.001)   |
| Homicides                                   | −.008<br>(.007)   | .001<br>(.006)   | −.007<br>(.007)   | .002<br>(.006)    | .001<br>(.006)    |
| Sewerage                                    | −.012<br>(.036)   | .191**<br>(.039) | .020<br>(.035)    | .176**<br>(.036)  | .186**<br>(.039)  |
| Municipal alignment                         | −.014<br>(.013)   | −.007<br>(.010)  | −.015<br>(.013)   | −.006<br>(.010)   | −.007<br>(.010)   |
| State alignment                             | −.011<br>(.026)   | −.007<br>(.021)  | −.012<br>(.026)   | −.007<br>(.021)   | −.007<br>(.020)   |
| Left-wing mayor                             | .018              | .011             | .020              | .014              | .011              |

|                    |         |        |         |        |        |
|--------------------|---------|--------|---------|--------|--------|
|                    | (.015)  | (.015) | (.015)  | (.015) | (.015) |
| Left-wing governor | -.122** | .072** | -.109** | .074** | .074** |
|                    | (.025)  | (.016) | (.025)  | (.016) | (.016) |
| Corrupt mayor      | -.040+  | -.002  | -.041+  | -.005  | -.003  |
|                    | (.024)  | (.019) | (.023)  | (.019) | (.019) |
| Corrupt governor   | .065    | -.335* | .009    | -.335* | -.341* |
|                    | (.058)  | (.148) | (.065)  | (.147) | (.148) |
| Utility FE         | Yes     | Yes    | Yes     | Yes    | Yes    |
| Year FE            | Yes     | Yes    | Yes     | Yes    | Yes    |
| Observations       | 15055   | 15055  | 15055   | 14898  | 15055  |
| R-squared          | .625    | .947   | .632    | .948   | .947   |

+  $p < .10$ , \*  $p < .05$ ; \*\*  $p < .01$ ; two-tailed tests.

\* Standard errors clustered at the utility level are shown in parentheses. The main effect of state and municipal election does not appear in the table because they are absorbed by the year fixed effects. In model 4, the two-way interaction between election year dummies and poor community, the two-way interaction between SOE and poor community, and the three-way interaction between municipal election, SOE, and poor community are also included. In model 5, the two-way interaction between municipal election and SOE with private investors is included. The indicator for SOE with private investors is also included directly. These coefficients are not reported here to conserve space.



**Table A6. The Effect of State Elections on State-owned Enterprises: Models without Matching\***

| Hypothesis tested                           | H1                | H2a               | H2b               | H3                  | H4                |
|---------------------------------------------|-------------------|-------------------|-------------------|---------------------|-------------------|
| Dependent variable                          | Return on sales   | Log employment    | Return on sales   | Log employment      | Log employment    |
|                                             | (1)               | (2)               | (3)               | (4)                 | (5)               |
| <i>Main independent variables</i>           |                   |                   |                   |                     |                   |
| State election × SOE                        | −.076**<br>(.009) | .051**<br>(.006)  | −.069**<br>(.009) | .227**<br>(.067)    | .062**<br>(.007)  |
| Log employment at organization              |                   |                   | −.123**<br>(.013) |                     |                   |
| State election × SOE × Community poverty    |                   |                   |                   | .030**<br>(.011)    |                   |
| State election × SOE with private investors |                   |                   |                   |                     | −.035**<br>(.006) |
| <i>Controls</i>                             |                   |                   |                   |                     |                   |
| State election                              | .015+<br>(.008)   | −.001<br>(.005)   | .015+<br>(.008)   | −.047<br>(.057)     | −.001<br>(.005)   |
| Municipal election                          | −.010<br>(.009)   | .001<br>(.006)    | −.010<br>(.009)   | .263**<br>(.079)    | .003<br>(.006)    |
| SOE                                         | .007<br>(.084)    | −.292*<br>(.143)  | −.029<br>(.086)   | −5.974**<br>(1.716) | −.371**<br>(.139) |
| Municipal election × SOE                    | .022*<br>(.010)   | .012+<br>(.007)   | .023*<br>(.010)   | .010<br>(.088)      | .035**<br>(.008)  |
| Municipal population                        | .022<br>(.052)    | .167**<br>(.041)  | .042<br>(.052)    | .162**<br>(.040)    | .170**<br>(.040)  |
| Municipal GDP                               | .059**<br>(.011)  | .181**<br>(.010)  | .082**<br>(.011)  | .184**<br>(.010)    | .181**<br>(.010)  |
| Urban                                       | .214*<br>(.086)   | .254**<br>(.094)  | .245**<br>(.085)  | .249**<br>(.093)    | .229*<br>(.093)   |
| State unemployment rate                     | .002<br>(.003)    | −.011**<br>(.003) | .000<br>(.003)    | −.011**<br>(.003)   | −.009**<br>(.003) |
| Federal transfers to the municipality       | −.004+<br>(.002)  | .005+<br>(.003)   | −.003<br>(.002)   | .005+<br>(.003)     | .005+<br>(.003)   |
| Federal funds to water and sanitation       | .000<br>(.001)    | .001<br>(.001)    | .000<br>(.001)    | .001+<br>(.001)     | .001<br>(.001)    |
| State funds to water and sanitation         | .001<br>(.001)    | −.001<br>(.001)   | .001<br>(.001)    | −.001<br>(.001)     | −.001<br>(.001)   |
| Homicides                                   | −.005<br>(.004)   | .016**<br>(.004)  | −.003<br>(.004)   | .016**<br>(.004)    | .015**<br>(.004)  |
| Sewerage                                    | −.009<br>(.020)   | .213**<br>(.025)  | .018<br>(.019)    | .203**<br>(.024)    | .205**<br>(.024)  |
| Municipal alignment                         | −.010             | −.005             | −.010             | −.004               | −.005             |

|                    |         |         |         |         |         |
|--------------------|---------|---------|---------|---------|---------|
|                    | (.008)  | (.007)  | (.008)  | (.007)  | (.006)  |
| State alignment    | -.009   | -.002   | -.009   | -.002   | -.002   |
|                    | (.016)  | (.014)  | (.016)  | (.014)  | (.014)  |
| Left-wing mayor    | .008    | .009    | .010    | .010    | .008    |
|                    | (.012)  | (.011)  | (.012)  | (.011)  | (.010)  |
| Left-wing governor | -.092** | .074**  | -.083** | .075**  | .075**  |
|                    | (.012)  | (.009)  | (.012)  | (.009)  | (.009)  |
| Corrupt mayor      | -.017   | -.014   | -.019   | -.017   | -.015   |
|                    | (.017)  | (.012)  | (.017)  | (.012)  | (.012)  |
| Corrupt governor   | .149*   | -.484** | .089    | -.484** | -.485** |
|                    | (.062)  | (.130)  | (.056)  | (.129)  | (.130)  |
| Utility FE         | Yes     | Yes     | Yes     | Yes     | Yes     |
| Observations       | 41301   | 41301   | 41301   | 41068   | 41301   |
| R-squared          | .643    | .939    | .647    | .940    | .940    |

+  $p < .10$ , \*  $p < .05$ ; \*\*  $p < .01$ ; two-tailed tests.

\* Standard errors clustered at the utility level are shown in parentheses. In model 4, the two-way interaction between election year dummies and poor community, the two-way interaction between SOE and poor community, and the three-way interaction between municipal election, SOE, and poor community are also included. In model 5, the two-way interaction between municipal election and SOE with private investors is included. The indicator for SOE with private investors is also included directly. These coefficients are not reported here to conserve space.

**Table A7. The Effect of State Elections on State-owned Enterprises: Control Group Includes Only Private Firms\***

| Hypothesis tested                           | H1                | H2a               | H2b               | H3                | H4                |
|---------------------------------------------|-------------------|-------------------|-------------------|-------------------|-------------------|
| Dependent variable                          | Return on sales   | Log employment    | Return on sales   | Log employment    | Log employment    |
|                                             | (1)               | (2)               | (3)               | (4)               | (5)               |
| <i>Main independent variables</i>           |                   |                   |                   |                   |                   |
| State election × SOE                        | −.045**<br>(.010) | .039**<br>(.013)  | −.041**<br>(.010) | .038<br>(.141)    | .051**<br>(.014)  |
| Log employment at organization              |                   |                   | −.104**<br>(.013) |                   |                   |
| State election × SOE × Community poverty    |                   |                   |                   | −.000<br>(.023)   |                   |
| State election × SOE with private investors |                   |                   |                   |                   | −.036**<br>(.006) |
| <i>Controls</i>                             |                   |                   |                   |                   |                   |
| State election                              | −.016+<br>(.009)  | .011<br>(.013)    | −.015<br>(.009)   | .144<br>(.136)    | .010<br>(.013)    |
| Municipal election                          | .104**<br>(.019)  | .052**<br>(.016)  | .109**<br>(.019)  | .809**<br>(.153)  | .054**<br>(.016)  |
| SOE                                         | −.380*<br>(.192)  | −.335*<br>(.162)  | −.415*<br>(.180)  | 1.748<br>(8.978)  | −.382*<br>(.149)  |
| Municipal election × SOE                    | −.094**<br>(.019) | −.041*<br>(.016)  | −.099**<br>(.020) | −.531**<br>(.158) | −.016<br>(.017)   |
| Municipal population                        | .029<br>(.055)    | .190**<br>(.043)  | .049<br>(.056)    | .187**<br>(.043)  | .191**<br>(.043)  |
| Municipal GDP                               | .043**<br>(.011)  | .202**<br>(.011)  | .064**<br>(.011)  | .202**<br>(.011)  | .202**<br>(.011)  |
| Urban                                       | .298**<br>(.093)  | .252**<br>(.096)  | .324**<br>(.092)  | .257**<br>(.096)  | .237*<br>(.096)   |
| State unemployment rate                     | −.001<br>(.003)   | −.011**<br>(.003) | −.003<br>(.003)   | −.011**<br>(.003) | −.010**<br>(.003) |
| Federal transfers to the municipality       | −.003<br>(.002)   | .005+<br>(.003)   | −.002<br>(.002)   | .005+<br>(.003)   | .005+<br>(.003)   |
| Federal funds to water and sanitation       | .000<br>(.001)    | .001<br>(.001)    | .000<br>(.001)    | .001<br>(.001)    | .001<br>(.001)    |
| State funds to water and sanitation         | .001<br>(.001)    | −.001<br>(.001)   | .001<br>(.001)    | −.001<br>(.001)   | −.001<br>(.001)   |
| Homicides                                   | −.005<br>(.005)   | .015**<br>(.004)  | −.003<br>(.005)   | .016**<br>(.004)  | .015**<br>(.004)  |
| Sewerage                                    | −.008<br>(.019)   | .222**<br>(.026)  | .015<br>(.018)    | .216**<br>(.026)  | .216**<br>(.026)  |

|                     |                   |                   |                   |                   |                   |
|---------------------|-------------------|-------------------|-------------------|-------------------|-------------------|
| Municipal alignment | -.014<br>(.008)   | -.003<br>(.007)   | -.014+<br>(.008)  | -.002<br>(.007)   | -.002<br>(.007)   |
| State alignment     | -.005<br>(.017)   | -.004<br>(.016)   | -.005<br>(.017)   | -.004<br>(.016)   | -.003<br>(.015)   |
| Left-wing mayor     | .002<br>(.013)    | .010<br>(.011)    | .003<br>(.013)    | .011<br>(.011)    | .010<br>(.011)    |
| Left-wing governor  | -.108**<br>(.013) | .086**<br>(.010)  | -.099**<br>(.013) | .086**<br>(.010)  | .087**<br>(.011)  |
| Corrupt mayor       | -.010<br>(.018)   | -.025*<br>(.012)  | -.012<br>(.018)   | -.027*<br>(.013)  | -.026*<br>(.012)  |
| Corrupt governor    | .145*<br>(.062)   | -.467**<br>(.130) | .097+<br>(.057)   | -.468**<br>(.130) | -.467**<br>(.130) |
| Utility FE          | Yes               | Yes               | Yes               | Yes               | Yes               |
| Observations        | 35166             | 35166             | 35166             | 35060             | 35166             |
| R-squared           | .593              | .927              | .596              | .927              | .927              |

+  $p < .10$ , \*  $p < .05$ ; \*\*  $p < .01$ ; two-tailed tests.

\* Standard errors clustered at the utility level are shown in parentheses. In model 4, the two-way interaction between election year dummies and poor community, the two-way interaction between SOE and poor community, and the three-way interaction between municipal election, SOE, and poor community are also included. In model 5, the two-way interaction between municipal election and SOE with private investors is included. The indicator for SOE with private investors is also included directly. These coefficients are not reported here to conserve space.

**Table A8. The Effect of State Elections on State-owned Enterprises: Control Group Includes Only Departments\***

| Hypothesis tested                           | H1                | H2a               | H2b               | H3                  | H4                |
|---------------------------------------------|-------------------|-------------------|-------------------|---------------------|-------------------|
| Dependent variable                          | Return on sales   | Log employment    | Return on sales   | Log employment      | Log employment    |
|                                             | (1)               | (2)               | (3)               | (4)                 | (5)               |
| <i>Main independent variables</i>           |                   |                   |                   |                     |                   |
| State election × SOE                        | -.072**<br>(.010) | .044**<br>(.006)  | -.066**<br>(.010) | .200*<br>(.078)     | .055**<br>(.007)  |
| Log employment at organization              |                   |                   | -.120**<br>(.014) |                     |                   |
| State election × SOE × Community poverty    |                   |                   |                   | .026*<br>(.013)     |                   |
| State election × SOE with private investors |                   |                   |                   |                     | -.034**<br>(.006) |
| <i>Controls</i>                             |                   |                   |                   |                     |                   |
| State election                              | .012<br>(.009)    | .005<br>(.005)    | .012<br>(.009)    | -.021<br>(.070)     | .005<br>(.005)    |
| Municipal election                          | -.031**<br>(.011) | -.014*<br>(.006)  | -.033**<br>(.010) | -.042<br>(.082)     | -.012*<br>(.006)  |
| SOE                                         | .040<br>(.089)    | -.284+<br>(.157)  | .005<br>(.091)    | -6.425**<br>(1.796) | -.360*<br>(.152)  |
| Municipal election × SOE                    | .042**<br>(.011)  | .026**<br>(.007)  | .045**<br>(.011)  | .316**<br>(.091)    | .050**<br>(.008)  |
| Municipal population                        | .017<br>(.055)    | .167**<br>(.043)  | .037<br>(.056)    | .163**<br>(.043)    | .169**<br>(.043)  |
| Municipal GDP                               | .045**<br>(.011)  | .187**<br>(.010)  | .067**<br>(.011)  | .189**<br>(.010)    | .186**<br>(.010)  |
| Urban                                       | .247**<br>(.091)  | .222*<br>(.100)   | .274**<br>(.090)  | .221*<br>(.099)     | .197*<br>(.099)   |
| State unemployment rate                     | .000<br>(.003)    | -.012**<br>(.003) | -.001<br>(.003)   | -.012**<br>(.003)   | -.010**<br>(.003) |
| Federal transfers to the municipality       | -.004+<br>(.002)  | .005+<br>(.003)   | -.004+<br>(.002)  | .005+<br>(.003)     | .005+<br>(.003)   |
| Federal funds to water and sanitation       | .000<br>(.001)    | .001<br>(.001)    | .000<br>(.001)    | .001<br>(.001)      | .001<br>(.001)    |
| State funds to water and sanitation         | .001<br>(.001)    | -.001<br>(.001)   | .000<br>(.001)    | -.001<br>(.001)     | -.001<br>(.001)   |
| Homicides                                   | -.004<br>(.005)   | .015**<br>(.004)  | -.003<br>(.005)   | .015**<br>(.004)    | .014**<br>(.004)  |
| Sewerage                                    | -.003<br>(.020)   | .215**<br>(.025)  | .023<br>(.020)    | .205**<br>(.024)    | .207**<br>(.025)  |

|                     |                   |                   |                   |                   |                   |
|---------------------|-------------------|-------------------|-------------------|-------------------|-------------------|
| Municipal alignment | -.009<br>(.008)   | -.004<br>(.007)   | -.009<br>(.008)   | -.003<br>(.007)   | -.004<br>(.007)   |
| State alignment     | -.010<br>(.017)   | -.002<br>(.015)   | -.010<br>(.017)   | -.002<br>(.015)   | -.002<br>(.014)   |
| Left-wing mayor     | .010<br>(.013)    | .008<br>(.011)    | .011<br>(.012)    | .010<br>(.011)    | .008<br>(.011)    |
| Left-wing governor  | -.089**<br>(.012) | .072**<br>(.010)  | -.080**<br>(.012) | .074**<br>(.010)  | .073**<br>(.010)  |
| Corrupt mayor       | -.015<br>(.018)   | -.020<br>(.013)   | -.017<br>(.018)   | -.023+<br>(.013)  | -.021<br>(.013)   |
| Corrupt governor    | .141*<br>(.063)   | -.479**<br>(.130) | .083<br>(.056)    | -.479**<br>(.130) | -.480**<br>(.130) |
| Utility FE          | Yes               | Yes               | Yes               | Yes               | Yes               |
| Observations        | 39799             | 39799             | 39799             | 39566             | 39799             |
| R-squared           | .644              | .939              | .648              | .939              | .939              |

+  $p < .10$ , \*  $p < .05$ ; \*\*  $p < .01$ ; two-tailed tests.

\* Standard errors clustered at the utility level are shown in parentheses. In model 4, the two-way interaction between election year dummies and poor community, the two-way interaction between SOE and poor community, and the three-way interaction between municipal election, SOE, and poor community are also included. In model 5, the two-way interaction between municipal election and SOE with private investors is included. The indicator for SOE with private investors is also included directly. These coefficients are not reported here to conserve space.

**Table A9. The Effect of State Elections on State-owned Enterprises: Models Include Interactions with Macroeconomic Variables\***

| Hypothesis tested                                | H1                | H2a                 | H2b               | H3                   | H4                  |
|--------------------------------------------------|-------------------|---------------------|-------------------|----------------------|---------------------|
| Dependent variable                               | Return on sales   | Log employment      | Return on sales   | Log employment       | Log employment      |
|                                                  | (1)               | (2)                 | (3)               | (4)                  | (5)                 |
| <i>Main independent variables</i>                |                   |                     |                   |                      |                     |
| State election × SOE                             | −.071**<br>(.010) | .044**<br>(.006)    | −.065**<br>(.010) | .253**<br>(.068)     | .059<br>(.007)      |
| Log employment at organization                   |                   |                     | −.126**<br>(.013) |                      |                     |
| State election × SOE × Community poverty         |                   |                     |                   | .036**<br>(.011)     |                     |
| State election × SOE with private investors      |                   |                     |                   |                      | −.039**<br>(.006)   |
| <i>Interactions with macroeconomic variables</i> |                   |                     |                   |                      |                     |
| Country GDP per capita × SOE                     | −.089<br>(.112)   | .636**<br>(.102)    | −.009<br>(.111)   | .630**<br>(.103)     | .584**<br>(.106)    |
| Country unemployment rate × SOE                  | .004<br>(.017)    | .063**<br>(.015)    | .012<br>(.017)    | .063**<br>(.015)     | .056**<br>(.015)    |
| Country inflation rate × SOE                     | .001<br>(.002)    | −.000<br>(.001)     | .001<br>(.002)    | .000<br>(.001)       | −.000<br>(.001)     |
| <i>Controls</i>                                  |                   |                     |                   |                      |                     |
| State election                                   | .013<br>(.009)    | −.001<br>(.006)     | .013<br>(.009)    | −.042<br>(.058)      | −.001<br>(.006)     |
| Municipal election                               | .003<br>(.010)    | .015*<br>(.007)     | .005<br>(.010)    | .265**<br>(.078)     | .016*<br>(.007)     |
| Country GDP per capita                           | .368**<br>(.100)  | .255**<br>(.089)    | .400**<br>(.100)  | .280**<br>(.089)     | .257**<br>(.089)    |
| Country unemployment rate                        | .028+<br>(.014)   | .021+<br>(.012)     | .031*<br>(.014)   | .024+<br>(.012)      | .021+<br>(.012)     |
| Country inflation rate                           | −.002<br>(.001)   | .001+<br>(.001)     | −.002<br>(.001)   | .001+<br>(.001)      | .001+<br>(.001)     |
| SOE                                              | .857<br>(1.220)   | −7.011**<br>(1.114) | −.026<br>(1.205)  | −12.554**<br>(2.055) | −6.483**<br>(1.154) |
| Municipal election × SOE                         | .025*<br>(.011)   | .020*<br>(.008)     | .027*<br>(.011)   | .065<br>(.088)       | .044**<br>(.009)    |
| Municipal population                             | .001<br>(.052)    | .170**<br>(.040)    | .022<br>(.052)    | .163**<br>(.040)     | .171**<br>(.040)    |
| Municipal GDP                                    | .011<br>(.016)    | .014<br>(.015)      | .013<br>(.016)    | .015<br>(.015)       | .015<br>(.015)      |

|                                       |         |         |         |         |         |
|---------------------------------------|---------|---------|---------|---------|---------|
| Urban                                 | .182*   | -.055   | .175+   | -.063   | -.060   |
|                                       | (.091)  | (.097)  | (.090)  | (.096)  | (.097)  |
| State unemployment rate               | .005    | .001    | .005    | .001    | .002    |
|                                       | (.003)  | (.003)  | (.003)  | (.003)  | (.003)  |
| Federal transfers to the municipality | -.006** | -.003   | -.006** | -.003   | -.003   |
|                                       | (.002)  | (.002)  | (.002)  | (.002)  | (.002)  |
| Federal funds to water and sanitation | .000    | .001    | .000    | .001    | .001    |
|                                       | (.001)  | (.001)  | (.001)  | (.001)  | (.001)  |
| State funds to water and sanitation   | .001    | -.001   | .001    | -.001   | -.001   |
|                                       | (.001)  | (.001)  | (.001)  | (.001)  | (.001)  |
| Homicides                             | -.006   | .011**  | -.005   | .011**  | .011**  |
|                                       | (.005)  | (.004)  | (.004)  | (.004)  | (.004)  |
| Sewerage                              | -.009   | .193**  | .016    | .184**  | .189**  |
|                                       | (.020)  | (.024)  | (.019)  | (.023)  | (.024)  |
| Municipal alignment                   | -.008   | -.004   | -.009   | -.002   | -.003   |
|                                       | (.008)  | (.006)  | (.008)  | (.007)  | (.006)  |
| State alignment                       | -.013   | -.003   | -.013   | -.004   | -.003   |
|                                       | (.016)  | (.014)  | (.016)  | (.014)  | (.014)  |
| Left-wing mayor                       | .011    | .006    | .012    | .008    | .006    |
|                                       | (.012)  | (.011)  | (.012)  | (.011)  | (.011)  |
| Left-wing governor                    | -.090** | .053**  | -.083** | .055**  | .054**  |
|                                       | (.012)  | (.009)  | (.012)  | (.009)  | (.009)  |
| Corrupt mayor                         | -.012   | .002    | -.011   | -.001   | .001    |
|                                       | (.017)  | (.012)  | (.017)  | (.012)  | (.012)  |
| Corrupt governor                      | .143*   | -.435** | .088    | -.434** | -.436** |
|                                       | (.063)  | (.131)  | (.056)  | (.131)  | (.131)  |
| Utility FE                            | Yes     | Yes     | Yes     | Yes     | Yes     |
| Observations                          | 41301   | 41301   | 41301   | 41068   | 41301   |
| R-squared                             | .644    | .940    | .648    | .941    | .941    |

+  $p < .10$ , \*  $p < .05$ ; \*\*  $p < .01$ ; two-tailed tests.

\* Standard errors clustered at the utility level are shown in parentheses.



**Table A10. The Effect of State Elections on State-owned Enterprises: Models Include State-specific Linear Trends\***

| Hypothesis tested                           | H1                | H2a               | H2b               | H3                  | H4                |
|---------------------------------------------|-------------------|-------------------|-------------------|---------------------|-------------------|
| Dependent variable                          | Return on sales   | Log employment    | Return on sales   | Log employment      | Log employment    |
|                                             | (1)               | (2)               | (3)               | (4)                 | (5)               |
| <i>Main independent variables</i>           |                   |                   |                   |                     |                   |
| State election × SOE                        | −.066**<br>(.009) | .045**<br>(.006)  | −.060**<br>(.009) | .215**<br>(.069)    | .056**<br>(.007)  |
| Log employment at organization              |                   |                   | −.115**<br>(.013) |                     |                   |
| State election × SOE × Community poverty    |                   |                   |                   | .029*<br>(.011)     |                   |
| State election × SOE with private investors |                   |                   |                   |                     | −.025**<br>(.006) |
| <i>Controls</i>                             |                   |                   |                   |                     |                   |
| State election                              | .003<br>(.008)    | −.003<br>(.005)   | .002<br>(.008)    | −.064<br>(.060)     | −.003<br>(.005)   |
| Municipal election                          | −.005<br>(.009)   | .002<br>(.006)    | −.004<br>(.009)   | .261**<br>(.080)    | .002<br>(.006)    |
| SOE                                         | −.005<br>(.084)   | −.321*<br>(.142)  | −.042<br>(.087)   | −5.943**<br>(1.752) | −.303*<br>(.142)  |
| Municipal election × SOE                    | .021*<br>(.010)   | .011<br>(.007)    | .023*<br>(.010)   | −.019<br>(.089)     | .034**<br>(.008)  |
| Municipal population                        | −.032<br>(.041)   | .175**<br>(.038)  | −.012<br>(.041)   | .171**<br>(.038)    | .175**<br>(.038)  |
| Municipal GDP                               | .010<br>(.015)    | .015<br>(.014)    | .011<br>(.015)    | .017<br>(.014)      | .015<br>(.014)    |
| Urban                                       | .044<br>(.084)    | .053<br>(.088)    | .050<br>(.083)    | .046<br>(.087)      | .062<br>(.089)    |
| State unemployment rate                     | .010**<br>(.003)  | −.009**<br>(.002) | .009**<br>(.003)  | −.008**<br>(.002)   | −.009**<br>(.003) |
| Federal transfers to the municipality       | −.005*<br>(.002)  | −.002<br>(.002)   | −.005*<br>(.002)  | −.003<br>(.002)     | −.002<br>(.002)   |
| Federal funds to water and sanitation       | .000<br>(.001)    | .001<br>(.001)    | .000<br>(.001)    | .001<br>(.001)      | .001<br>(.001)    |
| State funds to water and sanitation         | .001<br>(.001)    | −.001<br>(.001)   | .001<br>(.001)    | −.001<br>(.001)     | −.001<br>(.001)   |
| Homicides                                   | .003<br>(.004)    | −.001<br>(.004)   | .003<br>(.004)    | −.001<br>(.004)     | −.001<br>(.004)   |
| Sewerage                                    | −.005<br>(.017)   | .139**<br>(.022)  | .011<br>(.017)    | .131**<br>(.021)    | .139**<br>(.022)  |

|                     |                   |                  |                   |                  |                  |
|---------------------|-------------------|------------------|-------------------|------------------|------------------|
| Municipal alignment | −.022**<br>(.007) | −.007<br>(.006)  | −.023**<br>(.007) | −.005<br>(.006)  | −.006<br>(.006)  |
| State alignment     | .029*<br>(.015)   | −.014<br>(.013)  | .028+<br>(.015)   | −.014<br>(.013)  | −.014<br>(.013)  |
| Left-wing mayor     | −.023*<br>(.011)  | .002<br>(.010)   | −.023*<br>(.011)  | .003<br>(.010)   | .002<br>(.010)   |
| Left-wing governor  | −.083**<br>(.017) | .049**<br>(.012) | −.078**<br>(.016) | .049**<br>(.012) | .049**<br>(.012) |
| Corrupt mayor       | .003<br>(.015)    | .008<br>(.011)   | .004<br>(.015)    | .004<br>(.011)   | .007<br>(.011)   |
| Corrupt governor    | −.096<br>(.089)   | −.243*<br>(.097) | −.124<br>(.090)   | −.244*<br>(.097) | −.241*<br>(.097) |
| Utility FE          | Yes               | Yes              | Yes               | Yes              | Yes              |
| Observations        | 41301             | 41301            | 41301             | 41068            | 41301            |
| R-squared           | .674              | .987             | .677              | .987             | .987             |

+  $p < .10$ , \*  $p < .05$ ; \*\*  $p < .01$ ; two-tailed tests.

\* Standard errors clustered at the utility level are shown in parentheses.

**Table A11. The Effect of State Elections on State-owned Enterprises: Models Consider Alternative Dependent Variables\***

| Hypothesis tested                     | H1                 | H2a               |
|---------------------------------------|--------------------|-------------------|
| Dependent variable                    | Labor productivity | Employment change |
|                                       | (1)                | (2)               |
| <i>Main independent variables</i>     |                    |                   |
| State election × SOE                  | −.061**<br>(.008)  | .051**<br>(.011)  |
| <i>Controls</i>                       |                    |                   |
| State election                        | .038**<br>(.007)   | .029**<br>(.008)  |
| Municipal election                    | −.022*<br>(.009)   | .043**<br>(.010)  |
| SOE                                   | .756**<br>(.126)   | −.033<br>(.060)   |
| Municipal election × SOE              | .004<br>(.009)     | .004<br>(.012)    |
| Municipal population                  | .066<br>(.051)     | −.121**<br>(.047) |
| Municipal GDP                         | .421**<br>(.014)   | −.066**<br>(.009) |
| Urban                                 | .565**<br>(.104)   | −.139<br>(.090)   |
| State unemployment rate               | −.013**<br>(.003)  | −.008**<br>(.003) |
| Federal transfers to the municipality | .019**<br>(.004)   | −.004<br>(.003)   |
| Federal funds to water and sanitation | −.001<br>(.001)    | −.000<br>(.001)   |
| State funds to water and sanitation   | .001<br>(.001)     | −.001<br>(.001)   |
| Homicides                             | .010*<br>(.005)    | −.005<br>(.005)   |
| Sewerage                              | −.030<br>(.023)    | .043**<br>(.016)  |
| Municipal alignment                   | −.006<br>(.008)    | −.004<br>(.006)   |
| State alignment                       | .023<br>(.017)     | .020+<br>(.012)   |
| Left-wing mayor                       | −.010<br>(.013)    | −.028**<br>(.009) |
| Left-wing governor                    | −.062**<br>(.012)  | −.095**<br>(.009) |
| Corrupt mayor                         | −.047**<br>(.015)  | .005<br>(.011)    |
| Corrupt governor                      | .593**<br>(.168)   | −.269**<br>(.043) |
| Utility FE                            | Yes                | Yes               |
| Observations                          | 39156              | 37738             |
| R-squared                             | .843               | .071              |

+  $p < .10$ ; \*  $p < .05$ ; \*\*  $p < .01$ ; two-tailed tests.

\* Standard errors clustered at the utility level are shown in parentheses.

**Table A12. The Effect of State Elections on State-owned Enterprises: Only Municipalities That Have Not Changed the Form of Provision\***

| Hypothesis tested                     | H1                | H2a               |
|---------------------------------------|-------------------|-------------------|
| Dependent variable                    | Return on sales   | Log employment    |
|                                       | (1)               | (2)               |
| <i>Main independent variables</i>     |                   |                   |
| State election × SOE                  | −.077**<br>(.010) | .060**<br>(.006)  |
| <i>Controls</i>                       |                   |                   |
| State election                        | .008<br>(.009)    | −.007<br>(.005)   |
| Municipal election                    | −.021*<br>(.010)  | −.013*<br>(.006)  |
| Municipal election × SOE              | .028**<br>(.011)  | .038**<br>(.007)  |
| Municipal population                  | .003<br>(.058)    | .202**<br>(.044)  |
| Municipal GDP                         | .055**<br>(.012)  | .165**<br>(.010)  |
| Urban                                 | .266**<br>(.101)  | .179+<br>(.103)   |
| State unemployment rate               | .001<br>(.003)    | −.010**<br>(.003) |
| Federal transfers to the municipality | −.004+<br>(.002)  | .003<br>(.003)    |
| Federal funds to water and sanitation | .001<br>(.001)    | .001<br>(.001)    |
| State funds to water and sanitation   | .001<br>(.001)    | −.001<br>(.001)   |
| Homicides                             | −.005<br>(.005)   | .018**<br>(.004)  |
| Sewerage                              | .032<br>(.023)    | .142**<br>(.029)  |
| Municipal alignment                   | −.011<br>(.009)   | −.005<br>(.007)   |
| State alignment                       | −.014<br>(.018)   | −.002<br>(.015)   |
| Left-wing mayor                       | .012<br>(.013)    | .009<br>(.011)    |
| Left-wing governor                    | −.097**<br>(.012) | .077**<br>(.009)  |
| Corrupt mayor                         | −.015<br>(.019)   | −.021<br>(.013)   |
| Corrupt governor                      | .146*<br>(.063)   | −.489**<br>(.130) |
| Utility FE                            | Yes               | Yes               |
| Observations                          | 35824             | 35824             |
| R-squared                             | .644              | .941              |

+  $p < .10$ , \*  $p < .05$ ; \*\*  $p < .01$ ; two-tailed tests.

\* Standard errors clustered at the utility level are shown in parentheses.

**Table A13. The Effect of State Elections on State-owned Enterprises: Variation in the Share of Private Ownership in SOEs\***

| Hypothesis tested                                      | H1                | H2a               |
|--------------------------------------------------------|-------------------|-------------------|
| Dependent variable                                     | Return on sales   | Log employment    |
|                                                        | (1)               | (2)               |
| <i>Main independent variables</i>                      |                   |                   |
| State election × Share of private ownership in SOE     | .165**<br>(.016)  | -.093**<br>(.012) |
| <i>Controls</i>                                        |                   |                   |
| State election                                         | -.089**<br>(.006) | .063**<br>(.005)  |
| Municipal election                                     | .006<br>(.006)    | .033**<br>(.005)  |
| Share of private ownership in SOE                      | .097**<br>(.019)  | .251**<br>(.028)  |
| Municipal election × Share of private ownership in SOE | .001<br>(.014)    | -.140**<br>(.013) |
| Municipal population                                   | .024<br>(.060)    | .195**<br>(.046)  |
| Municipal GDP                                          | .034**<br>(.011)  | .198**<br>(.011)  |
| Urban                                                  | .288**<br>(.100)  | .227*<br>(.102)   |
| State unemployment rate                                | -.004<br>(.003)   | -.011**<br>(.003) |
| Federal transfers to the municipality                  | -.004<br>(.002)   | .005*<br>(.003)   |
| Federal funds to water and sanitation                  | .000<br>(.001)    | .001<br>(.001)    |
| State funds to water and sanitation                    | .001<br>(.001)    | -.001<br>(.001)   |
| Homicides                                              | -.005<br>(.005)   | .014**<br>(.004)  |
| Sewerage                                               | -.004<br>(.020)   | .209**<br>(.027)  |
| Municipal alignment                                    | -.011<br>(.009)   | -.003<br>(.007)   |
| State alignment                                        | -.004<br>(.018)   | -.001<br>(.016)   |
| Left-wing mayor                                        | .003<br>(.013)    | .009<br>(.012)    |
| Left-wing governor                                     | -.112**<br>(.014) | .087**<br>(.011)  |
| Corrupt mayor                                          | -.011<br>(.019)   | -.029*<br>(.013)  |
| Corrupt governor                                       | .152*<br>(.063)   | -.469**<br>(.130) |
| Utility FE                                             | Yes               | Yes               |
| Observations                                           | 33614             | 33614             |
| R-squared                                              | .591              | .924              |

+  $p < .10$ ; \*  $p < .05$ ; \*\*  $p < .01$ ; two-tailed tests.

\* Standard errors clustered at the utility level are shown in parentheses.
